# Supplementary material for: Dietary diversity determinants and contribution of fish to maternal and under-five nutritional status in Zambia
Source: PLOS journal article supplement (doi:10.1371/journal.pone.0204009), 2018-09-24

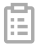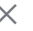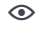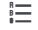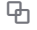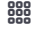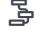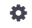

METADATA: START TIME, END TIME, TODAY, DEVICE ID, SUBSCRIBER ID, PHONE NUMBER

## ▼ General Information

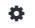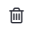

123

\* i. Questionnaire number

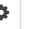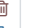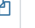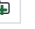

abc

\* ii. Name of enumerator

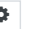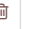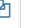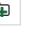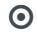

▼ \* iii. Name of supervisor

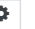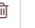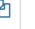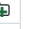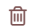

MIYوبا NIXON

Value:

1

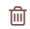

MULONGWE MCDONALD

Value:

2

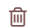

OLIVER MALUPANDE

Value:

3



CONSTANCE NG'WANE

Value:

4

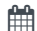

\* iv. Date of survey

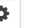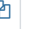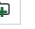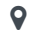

v. Take the GPS coordinates of the place!

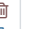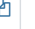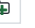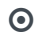

▼ \* vi. Is there a child in the household that is between 2 and 5 years of age?

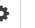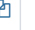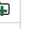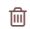

Yes

Value:

1



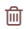

Kanyama

Value:

kanyama

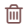

Matero

Value:

matero

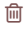

Munali

Value:

munali

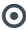

▼ \* Name of ward:

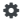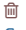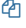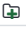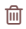

Kanyama

Value:

kanyama

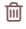

Matero

Value:

matero

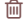

Mtendere

Value:

mtendere

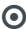

▼ \* CSA:

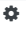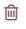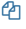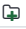

2

Value:

2



14

Value:

14

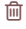

16

Value:

16

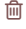

17

Value:

17

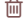

19

Value:

19

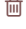

22

Value:

22

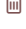

23

Value:

23

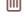

25

Value:

25



26

Value:

26

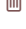

30

Value:

30

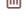

32

Value:

32

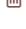

53

Value:

53

|                                                                                        |        |    |
|----------------------------------------------------------------------------------------|--------|----|
|  54    | Value: | 54 |
|  55   | Value: | 55 |
|  12   | Value: | 12 |
|  13   | Value: | 13 |
|  14   | Value: | 14 |
|  3    | Value: | 3  |
|  4    | Value: | 4  |
|  11   | Value: | 11 |
|  15   | Value: | 15 |
|  17   | Value: | 17 |
|  18   | Value: | 18 |
|  19   | Value: | 19 |
|  20   | Value: | 20 |
|  21   | Value: | 21 |
|  22   | Value: | 22 |
|  24   | Value: | 24 |
|  25  | Value: | 25 |
|  26 | Value: | 26 |
|  30 | Value: | 30 |
|  32 | Value: | 32 |

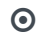

▼ \* SEA:

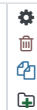

|                                                                                       |        |   |
|---------------------------------------------------------------------------------------|--------|---|
|  3 | Value: | 3 |
|  2 | Value: | 2 |
|  1 | Value: | 1 |

|                                                                                       |        |   |
|---------------------------------------------------------------------------------------|--------|---|
|  5    | Value: | 5 |
|  3   | Value: | 3 |
|  3   | Value: | 3 |
|  5   | Value: | 5 |
|  1   | Value: | 1 |
|  2   | Value: | 2 |
|  4   | Value: | 4 |
|  1   | Value: | 1 |
|  1   | Value: | 1 |
|  1   | Value: | 1 |
|  5   | Value: | 5 |
|  4   | Value: | 4 |
|  1   | Value: | 1 |
|  2   | Value: | 2 |
|  3   | Value: | 3 |
|  4   | Value: | 4 |
|  5   | Value: | 5 |
|  1  | Value: | 1 |
|  2 | Value: | 2 |
|  3 | Value: | 3 |
|  4 | Value: | 4 |
|  5 | Value: | 5 |
|  6 | Value: | 6 |
|  1 | Value: | 1 |
|  2 | Value: | 2 |
|  3 | Value: | 3 |
|  1 | Value: | 1 |
|  4 | Value: | 4 |

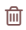

1

Value:

1

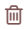

4

Value:

4

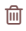

5

Value:

5



5

Value:

5



2

Value:

2



5

Value:

5

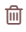

1

Value:

1



4

Value:

4



1

Value:

1



3

Value:

3



3

Value:

3

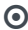

▼ \* Ethnic group

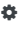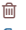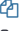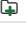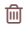

Lozi

Value:

1



Mbunda

Value:

2

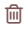

Luvale

Value:

3



Kaonde

Value:

4



Bemba

Value:

5



Tonga

Value:

6



Other (please specify!)

Value:

998

abc

\* If other, please specify!

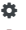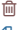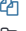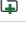

▼ Section B: Demographic and Social Economic Information

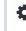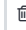

|     |                                                                                                                                                                                                                                                                                                                                                                                                                                                                                                                                                                                                                                                                            |                                                         |
|-----|----------------------------------------------------------------------------------------------------------------------------------------------------------------------------------------------------------------------------------------------------------------------------------------------------------------------------------------------------------------------------------------------------------------------------------------------------------------------------------------------------------------------------------------------------------------------------------------------------------------------------------------------------------------------------|---------------------------------------------------------|
| 123 | * When were you born?                                                                                                                                                                                                                                                                                                                                                                                                                                                                                                                                                                                                                                                      | <div><div></div><div></div><div></div><div></div></div> |
| 1+1 | int(2015 - \${B1a})                                                                                                                                                                                                                                                                                                                                                                                                                                                                                                                                                                                                                                                        | <div><div></div><div></div><div></div><div></div></div> |
| ≡   | Respondent is \${B1b} years old.                                                                                                                                                                                                                                                                                                                                                                                                                                                                                                                                                                                                                                           | <div><div></div><div></div><div></div><div></div></div> |
| ⦿   | ▼ * Indicate the gender:                                                                                                                                                                                                                                                                                                                                                                                                                                                                                                                                                                                                                                                   | <div><div></div><div></div><div></div><div></div></div> |
|     | <div><div><div></div>Female</div><div>Value:</div><div>1</div></div> <div><div><div></div>Male</div><div>Value:</div><div>0</div></div>                                                                                                                                                                                                                                                                                                                                                                                                                                                                                                                                    |                                                         |
| ⦿   | ▼ * What is the relationship to the child?                                                                                                                                                                                                                                                                                                                                                                                                                                                                                                                                                                                                                                 | <div><div></div><div></div><div></div><div></div></div> |
|     | <div><div><div><div></div>Father</div><div>Value:</div><div>1</div></div><div><div><div></div>Mother</div><div>Value:</div><div>2</div></div><div><div><div></div>Sister</div><div>Value:</div><div>3</div></div><div><div><div></div>Brother</div><div>Value:</div><div>4</div></div><div><div><div></div>Uncle</div><div>Value:</div><div>5</div></div><div><div><div></div>Aunt</div><div>Value:</div><div>6</div></div><div><div><div></div>Grandmother</div><div>Value:</div><div>7</div></div><div><div><div></div>Grandfather</div><div>Value:</div><div>8</div></div><div><div><div></div>Other (please specify!)</div><div>Value:</div><div>998</div></div></div> |                                                         |

abc

\* If other, please specify!

▼ \* What is the highest level of education you have attained?

None

Value:

0

Primary (Grade 1-4)

Value:

1

Primary (Grade 5-7)

Value:

2

Secondary (Grade 8-9)

Value:

3

Secondary (Grade 10-12)

Value:

4

Tertiary

Value:

5

▼ \* What is your marital status?

Single

Value:

1

Married

Value:

2

Cohabiting

Value:

3

Separated

Value:

4

Divorced

Value:

5

Widowed

Value:

6

123

\* How many people live in this household?

123

\* How many family members are below the age of 5 years in your household?





Salaried employment

Value:

1

Doing piecework (manual work)

Value:

2

Running small business (sales of veggies, rice, maize, beans, etc.)

Value:

3

Runnng small business (small shops, stationary, etc)

Value:

4

Firewood / charcoal sales

Value:

5

Skilled trade / artisan activity (carpenter, blacksmith, mason)

Value:

6

None

Value:

7

Other (please specify!)

Value:

998

abc

\* If other, please specify!

\* new question

Salaried employment

Value:

1

Doing piecework (manual work)

Value:

2

Running small business (sales of veggies, rice, maize, beans, etc.)

Value:

3

Runnng small business (small shops, stationary, etc)

Value:

4

Firewood / charcoal sales

Value:

5

Skilled trade / artisan activity (carpenter, blacksmith, mason)

Value:

6

None

Value:

7

Other (please specify!)

Value:

998

abc

\* If other, please specify!

\* new question

|             |                                                                     |        |     |
|-------------|---------------------------------------------------------------------|--------|-----|
| <div></div> | Salaried employment                                                 | Value: | 1   |
| <div></div> | Doing piecework (manual work)                                       | Value: | 2   |
| <div></div> | Running small business (sales of veggies, rice, maize, beans, etc.) | Value: | 3   |
| <div></div> | Runnng small business (small shops, stationary, etc)                | Value: | 4   |
| <div></div> | Firewood / charcoal sales                                           | Value: | 5   |
| <div></div> | Skilled trade / artisan activity (carpenter, blacksmith, mason)     | Value: | 6   |
| <div></div> | None                                                                | Value: | 7   |
| <div></div> | Other (please specify!)                                             | Value: | 998 |

abc

\* If other, please specify!

**Characteristics of housing**

\* What is the main construction material of the walls of your house?

|                        |        |   |
|------------------------|--------|---|
| Cane / palm / trunks   | Value: | 1 |
| Mud                    | Value: | 2 |
| Bamboo / pole with mud | Value: | 3 |
| Stone with mud         | Value: | 4 |
| Plywood                | Value: | 5 |
| Cardboard              | Value: | 6 |
| Reused wood            | Value: | 7 |
| Cement                 | Value: | 8 |

Stone with lime / cement

Value:

9

Bricks

Value:

10

Cement blocks

Value:

11

Wood planks

Value:

12

Other (please specify!)

Value:

998

abc

\* If other, please specify!

▼ \* What material is the roof made of?

Thatch / palm leaf

Value:

1

Rustic mat

Value:

2

Palm / bamboo

Value:

3

Wood planks

Value:

4

Cardboard

Value:

5

Metal / iron sheets

Value:

6

Wood

Value:

7

Calamine / cement fibre (Asbestos)

Value:

8

Ceramic tiles / Harvey tiles

Value:

9

Cement

Value:

10

Roofing shingles

Value:

11

Mud tiles

Value:

12

Other (please specify!)

Value:

998

abc

\* If other, please specify!



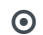

▼ \* What is your main source of drinking water?

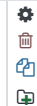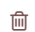

Piped into Dwelling

Value:

1

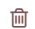

Piped into Yard/Plot

Value:

2



Public taps / standpipe

Value:

3



Protected dwell

Value:

4

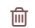

Unprotected dwell

Value:

5

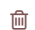

Protected spring

Value:

6

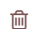

Unprotected spring

Value:

7

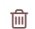

Rainwater

Value:

8



Tanker Truck

Value:

9



Cart with small tank

Value:

10



Surface water (river, pond, canal, stream)

Value:

11



Bottled water

Value:

12



Other (please specify!)

Value:

998

abc

\* If other, please specify!

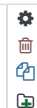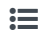

▼ \* What do you usually do to make the water safer to drink?

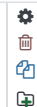

Boil

Value:

1



Add Bleach / chlorine / clorin

Value:

2



Strain through a cloth

Value:

3

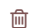

Use water filter

Value:

4



Solar disinfection

Value:

5

|                                                                                   |                         |        |     |
|-----------------------------------------------------------------------------------|-------------------------|--------|-----|
|   | Let it stand and settle | Value: | 6   |
|  | Nothing                 | Value: | 7   |
|  | Other (please specify!) | Value: | 998 |

abc

\* If other, please specify!

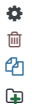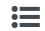

▼ \* How do you store your drinking water?

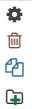

|                                                                                   |                              |        |     |
|-----------------------------------------------------------------------------------|------------------------------|--------|-----|
|  | Closed container / jerry can | Value: | 1   |
|  | Open container / bucket      | Value: | 2   |
|  | Does not store water         | Value: | 3   |
|  | Other (please specify!)      | Value: | 998 |

abc

\* If other, please specify!

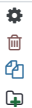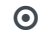

▼ \* What kind of toilet facility do members of your household use?

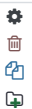

|                                                                                     |                                                    |        |   |
|-------------------------------------------------------------------------------------|----------------------------------------------------|--------|---|
|  | Flush or pour flush toilet (to piped sewer system) | Value: | 1 |
|  | Flush to septic tank                               | Value: | 2 |
|  | Flush to pit latrine                               | Value: | 3 |
|  | Flush to somewhere else                            | Value: | 4 |
|  | Flush to don't know where                          | Value: | 5 |
|  | VIP latrine                                        | Value: | 6 |
|  | Pit latrine with slab                              | Value: | 7 |

|                                                                                   |                                     |        |     |
|-----------------------------------------------------------------------------------|-------------------------------------|--------|-----|
|   | Pit latrine without slab / open pit | Value: | 8   |
|  | Composing Toilet                    | Value: | 9   |
|  | Bucket toilet                       | Value: | 10  |
|  | Hanging toilet / latrine            | Value: | 11  |
|  | No facility / bush / field          | Value: | 12  |
|  | Other (please specify!)             | Value: | 998 |

abc

\* If other, please specify!

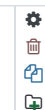

#### ▼ Assets owned by the household

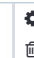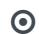

▼ \* Bicycles

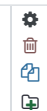

|                                                                                   |     |        |   |
|-----------------------------------------------------------------------------------|-----|--------|---|
|  | Yes | Value: | 1 |
|  | No  | Value: | 0 |



▼ \* Motorcycle

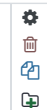

|                                                                                     |     |        |   |
|-------------------------------------------------------------------------------------|-----|--------|---|
|  | Yes | Value: | 1 |
|  | No  | Value: | 0 |



▼ \* Car

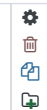





Yes

Value:

1

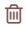

No

Value:

0

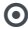

▼ \* Solar panels

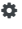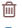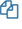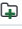

Yes

Value:

1



No

Value:

0

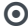

▼ \* Car batteries

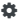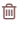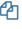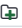

Yes

Value:

1



No

Value:

0

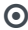

▼ \* Television (TV)

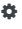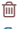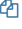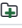

Yes

Value:

1



No

Value:

0

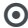

▼ \* Radio

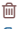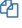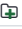

Yes

Value:

1



No

Value:

0

▼ \* Watch or clock

Yes

Value:

1

No

Value:

0

▼ \* Rental houses

Yes

Value:

1

No

Value:

0

▼ \* Wheelbarrow

Yes

Value:

1

No

Value:

0

▼ \* Axe

Yes

Value:

1

No

Value:

0

▼ \* Refrigerator

Yes

Value: 1

No

Value: 0

▼ Further assets owned by the household

▼ \* Mobile phone

None

Value: 0

One

Value: 1

More than one

Value: 2

▼ \* Cultivable land

Yes

Value: 1

No

Value: 0

1.0

\* How much land (ha) do you own?

▼ Section C: The 24 Hour Recall

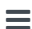

Before Beginning The 24 Hour Recall: ENUMERATOR, ask the respondent if the previous 24 hour period was "usual" or "normal" for the his/her household. If there was a special occasion, such as a funeral or feast, another day should be selected for the interview. If this is not possible, please select another household instead of asking the respondent about an earlier day in the week.

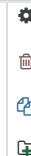

#### ▼ Day of the week:

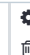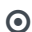

▼ \* What day is it today?

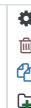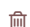

Monday

Value:

1

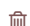

Tuesday

Value:

2

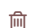

Wednesday

Value:

3

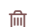

Thursday

Value:

4

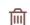

Friday

Value:

5



Saturday

Value:

6

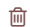

Sunday

Value:

7

#### ▼ Personal Details:

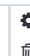

abc

\* What is your name?

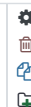

#### ▼ The 24 Hour Recall (mother or permanent care taker of the children)

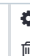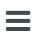

ENUMERATOR: Find out all the food and drinks (including drinking water) \$(name) ate since waking up yesterday until \$(name) went to sleep the next day. This includes snacks and drinks consumed between meals. Steps: \n1. Ask \$(name) about the first meal he/she had yesterday. \n2. Ask \$(name) about all the food and drinks he/she had during that meal. Write only ONE food or drink in each section A box. Click "+" on the lower right corner of section A to add a new box for each food or drink. Remember to ask about quantity of water added when cooking. \n3. If there is a mixed dish, please ask \$(name) for a list and quantities of ingredients. Remember to probe for added foods such as sugar in tea, oil in mixed dishes and fried food. Write each ingredient in a new section A box. Do not write down the mixed dish. ONLY write down the ingredients. \n4. After \$(name) recalls all the foods and drinks consumed for that meal, probe him/her to ensure that there is nothing else that he/she forgot to mention. If yes, add a new section A box and write in it. \n5. Probe \$(name) until he/she says "nothing else" before moving to the next meal. \n6. Ask \$(name) about the next meal he/she had yesterday. \n7. Repeat steps 2-6 until \$(name) says that he/she went to sleep the next day. \n8. Then go back and complete field C, D and E for each food item.

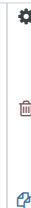

▼ Questions:

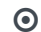

▼ \* B. What did you eat or drink?

|  |                                             |        |         |
|--|---------------------------------------------|--------|---------|
|  | Avocado fresh                               | Value: | F502111 |
|  | Banana Ripe                                 | Value: | 1       |
|  | Beans Solwezi Z                             | Value: | Z000021 |
|  | Beans. Kabulangeti Z                        | Value: | Z000020 |
|  | Beans. Kidney.boiled without salt           | Value: | Z000023 |
|  | Beans. white. boiled W                      | Value: | Z000019 |
|  | Beef fat fresh cooked                       | Value: | U103121 |
|  | Beef medium fat fresh cooked                | Value: | U102121 |
|  | Beef stomach/tripe cooked (offals)          | Value: | V551021 |
|  | Biscuits                                    | Value: | D700000 |
|  | Boiled potatoes (R)                         | Value: | _193301 |
|  | Bondwe boiled without salt W                | Value: | Z000011 |
|  | Bream (fish)                                | Value: | Z000034 |
|  | Brown bread from wheaten mixture            | Value: | B251000 |
|  | Busala                                      | Value: | 2       |
|  | Carrot fresh                                | Value: | G620111 |
|  | Carrot fresh cooked                         | Value: | G620121 |
|  | cassava leaves fresh cooked with groundnuts | Value: | Z000049 |
|  | caterpillars (vinkhulubala)                 | Value: | 3       |
|  | Chicken                                     | Value: | 21      |
|  | Chikanda                                    | Value: | 4       |
|  | Chinese cabbage                             | Value: | 20      |
|  | Chinese cabbage fresh cooked                | Value: | G321121 |

|                                                                                     |                                        |        |         |
|-------------------------------------------------------------------------------------|----------------------------------------|--------|---------|
|     | Chips (French-fried potatoes) (R)      | Value: | _164700 |
|    | Cola beverages (caffeinic)             | Value: | N330000 |
|    | Corn puffs                             | Value: | 22      |
|    | Cow's milk boiled                      | Value: | M110030 |
|    | Dairy Products-Tinned or Fresh milk    | Value: | 5       |
|    | Doughnuts (R)                          | Value: | _115001 |
|    | Eggs Boiled                            | Value: | Z000031 |
|    | Fish small dried with oil and tomatoes | Value: | Z000008 |
|    | Fried sausage (R)                      | Value: | _025002 |
|    | Groundnuts. Dried. raw Z               | Value: | Z000015 |
|    | Groundnuts. Powder T                   | Value: | Z000017 |
|    | Impwa                                  | Value: | 18      |
|    | Inswa                                  | Value: | 6       |
|    | Kapenta (fish)                         | Value: | Z000018 |
|    | Lumanda                                | Value: | 7       |
|    | Maize breakfast meal Z                 | Value: | Z000025 |
|    | Maize Porridge with sugar              | Value: | Z000046 |
|   | Maize roller meal Z                    | Value: | Z000026 |
|  | Maize samp                             | Value: | 8       |
|  | Mango fresh                            | Value: | F516111 |
|  | Manioc (cassava)                       | Value: | K410000 |
|  | Mice (mbeba)                           | Value: | 9       |
|  | Munkoyo                                | Value: | 10      |
|  | Mushrooms fresh cooked                 | Value: | K700121 |
|  | Natural yoghurt                        | Value: | 11      |
|  | Nshima Maize                           | Value: | Z000022 |
|  | Nshima, maize and sorghum              | Value: | Z000029 |
|  | Nshima, sorghum and millet             | Value: | Z000030 |

|                                                                                     |                                            |        |         |
|-------------------------------------------------------------------------------------|--------------------------------------------|--------|---------|
|     | Okra Lady fingers                          | Value: | 12      |
|    | Onion                                      | Value: | 19      |
|    | Onions fresh cooked                        | Value: | G480121 |
|    | Orange fresh                               | Value: | F603111 |
|    | Papaya fresh                               | Value: | F517111 |
|    | Peanut butter                              | Value: | 13      |
|    | Pizza                                      | Value: | _164100 |
|    | Pumpkin leaves cooked with groundnuts      | Value: | Z000063 |
|    | Pumpkin leaves relish without oil          | Value: | Z000006 |
|    | Rape fresh boiled                          | Value: | Z000010 |
|    | Rice parboiled cooked                      | Value: | C359022 |
|    | Salt                                       | Value: | 14      |
|    | Shake and Sip (maheu)                      | Value: | Z000040 |
|    | Sour milk                                  | Value: | 15      |
|    | Sugar T                                    | Value: | Z000012 |
|    | Sunflower oil                              | Value: | 16      |
|    | Sweet potato fresh EP                      | Value: | Z000038 |
|   | Sweet potato leaves boiled                 | Value: | Z000003 |
|  | Sweet potato leaves cooked with groundnuts | Value: | Z000052 |
|  | Tomato red fresh                           | Value: | G561111 |
|  | Tomatoes fresh cooked                      | Value: | G560121 |
|  | Water                                      | Value: | 17      |
|  | Watermelon fresh                           | Value: | F509111 |
|  | Wholemeal bread                            | Value: | B101000 |
|  | Other (please specify!)                    | Value: | 998     |

abc

\* If OTHER, please specify:

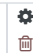

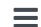

Please complete Sections: C, D and E ONLY after you have written down the all the food and drinks \${name} ate since waking up yesterday until \${name} went to sleep the next day.

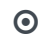

▼ \* C. How was this food item prepared?

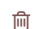

Raw / fresh

Value:

1

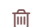

Boiled

Value:

2



Cooked

Value:

3

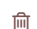

Roasted

Value:

4

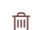

Fried

Value:

5

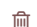

Steamed

Value:

6



Baked

Value:

7

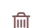

Smoked

Value:

8



Dried

Value:

9



Processed

Value:

10



Not applicable

Value:

999



No answer

Value:

997

1.0

\* D. Amount / quantity of food/drink consumed:

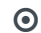

▼ \* E. Unit of measurement:

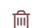

g (grams)

Value:

1

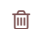

ml (milliliters)

Value:

2



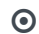

▼ \* F. Category:

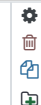

|  |                                                                                                                                                                                      |        |    |
|--|--------------------------------------------------------------------------------------------------------------------------------------------------------------------------------------|--------|----|
|  | Group 1A: Grains , roots, and tubers. i.e. maize meal porridge, maize meal and cassava porridge, sorghum and millet porridge, bread, rice, munkoyo and other foods made from grains. | Value: | 1a |
|  | Group 1B: White potatoes, sweet potatoes, white yams, cassava, chikanda and other foods made from roots.                                                                             | Value: | 1b |
|  | Food item was not mentioned in or does not fit any of the food categories above.                                                                                                     | Value: | 10 |
|  | Group 2: Legumes and nuts. i.e. beans, ground nuts, peas, lentils and seeds.                                                                                                         | Value: | 2  |
|  | Group 3: Milk and milk products (e.g.: cheese, milk (fresh & processed), sour milk, yoghurt, etc.)                                                                                   | Value: | 3a |
|  | Group 4: Flesh foods. i.e. organ meats (Liver, Kidney, Heart, Tongue) and any meat (Beef, Pork, Lamb, Goat, Chicken or Duck).                                                        | Value: | 4  |
|  | Group 5: Eggs                                                                                                                                                                        | Value: | 5  |
|  | Group 6A: Vitamin A rich fruit and vegetables yellow/orange colour in the inside (e.g. papaya, pumpkin, carrots, squash, or orange-fleshed sweet potatoes, guava, mangoes)           | Value: | 6a |
|  | Group 6B: Vitamin A rich vegetables. i.e. dark green vegetables, bondwe, chibwabwa, kalembula, Chinese cabbage                                                                       | Value: | 6b |
|  | Group 6C: other vegetables e.g. impwa, cucumber, cabbage                                                                                                                             | Value: | 6d |
|  | Group 7: Other fruit and vegetables. i.e. wild fruit (Mfungo, Mutungulu, Chisongole) or any other wild fruit or vegetables.                                                          | Value: | 7  |
|  | Group 8A: Others (i.e. any oil, fats, or butter or foods made with any of these)                                                                                                     | Value: | 8  |
|  | Group 8B: Others (i.e. any sugary foods (Chocolates, Sweets, Candies, Pastries, Cakes or Biscuits))                                                                                  | Value: | 8b |
|  | Group 8C: Others (i.e. condiments for flavor (Chillies, Spices, Herbs, or Fish powder))                                                                                              | Value: | 8c |
|  | Group 9: Beverages (i.e. tea, coffee, etc.)                                                                                                                                          | Value: | 9  |

1+1

count(\${questions})

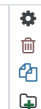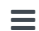

Number of food items \${name} ate yesterday: \${C2\_5}

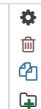

▼ 24 Hour Recall (child aged 6-23 months)

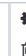

▼ Identify ONE representative infant from the household and complete the following fields:

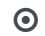

▼ \* Select gender:

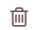

Male

Value:

1

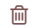

Female

Value:

2

123

\* Age in months:

abc

\* What is her / his name?

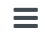

Beginning The 24 Hour Recall:

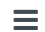

ENUMERATOR: Find out all the food and drinks (including drinking water)  $\$(name\_infant)$  ate since waking up yesterday until the infant went to sleep the next day. This includes snacks and drinks consumed between meals. Steps: \n1. Ask  $\$(name)$  about the first meal  $\$(name\_infant)$  had yesterday. \n2. Ask  $\$(name)$  about all the food and drinks  $\$(name\_infant)$  had during that meal. Write only ONE food or drink in each section A box. Click "+" on the lower right corner of section A to add a new box for each food or drink. Remember to ask about quantity of water added when cooking. 3. If there is a mixed dish, please ask  $\$(name)$  for a list and quantities of ingredients. Remember to probe for added foods such as sugar in tea, oil in mixed dishes and fried food. Write each ingredient in a new section A box. Do not write down the mixed dish. ONLY write down the ingredients. \n4. After  $\$(name)$  recalls all the foods and drinks  $\$(name\_infant)$  consumed for that meal, probe him/her to ensure that there is nothing else that he/she forgot to mention. If yes, add a new section A box and write in it. \n5. Probe  $\$(name)$  until he/she says "nothing else" before moving to the next meal. \n6. Ask  $\$(name)$  about the next meal the  $\$(name\_infant)$  had yesterday.\n7. Repeat steps 2-6 until  $\$(name)$  says that the  $\$(name\_infant)$  went to sleep the next day. 8. Then go back and complete field C, D and E for each food item.

▼ Questions:

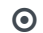

▼ \* B. What did  $\$(name\_infant)$  eat?

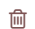

Avocado fresh

Value:

F502111

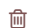

Banana Ripe

Value:

1

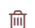

Beans Solwezi Z

Value:

Z000021

|                                                                                     |                                             |        |         |
|-------------------------------------------------------------------------------------|---------------------------------------------|--------|---------|
|     | Beans. Kabulangeti Z                        | Value: | Z000020 |
|    | Beans. Kidney.boiled without salt           | Value: | Z000023 |
|    | Beans. white. boiled W                      | Value: | Z000019 |
|    | Beef fat fresh cooked                       | Value: | U103121 |
|    | Beef medium fat fresh cooked                | Value: | U102121 |
|    | Beef stomach/tripe cooked (offals)          | Value: | V551021 |
|    | Biscuits                                    | Value: | D700000 |
|    | Boiled potatoes (R)                         | Value: | _193301 |
|    | Bondwe boiled without salt W                | Value: | Z000011 |
|    | Bream (fish)                                | Value: | Z000034 |
|    | Brown bread from wheaten mixture            | Value: | B251000 |
|    | Busala                                      | Value: | 2       |
|    | Carrot fresh                                | Value: | G620111 |
|    | Carrot fresh cooked                         | Value: | G620121 |
|    | cassava leaves fresh cooked with groundnuts | Value: | Z000049 |
|    | caterpillars (vinkhulubala)                 | Value: | 3       |
|    | Chicken                                     | Value: | 21      |
|  | Chikanda                                    | Value: | 4       |
|  | Chinese cabbage                             | Value: | 20      |
|  | Chinese cabbage fresh cooked                | Value: | G321121 |
|  | Chips (French-fried potatoes) (R)           | Value: | _164700 |
|  | Cola beverages (caffeinic)                  | Value: | N330000 |
|  | Corn puffs                                  | Value: | 22      |
|  | Cow's milk boiled                           | Value: | M110030 |
|  | Dairy Products-Tinned or Fresh milk         | Value: | 5       |
|  | Doughnuts (R)                               | Value: | _115001 |
|  | Eggs Boiled                                 | Value: | Z000031 |
|  | Fish small dried with oil and tomatoes      | Value: | Z000008 |

|                                                                                     |                                       |        |         |
|-------------------------------------------------------------------------------------|---------------------------------------|--------|---------|
|     | Fried sausage (R)                     | Value: | _025002 |
|    | Groundnuts. Dried. raw Z              | Value: | Z000015 |
|    | Groundnuts. Powder T                  | Value: | Z000017 |
|    | Impwa                                 | Value: | 18      |
|    | Inswa                                 | Value: | 6       |
|    | Kapenta (fish)                        | Value: | Z000018 |
|    | Lumanda                               | Value: | 7       |
|    | Maize breakfast meal Z                | Value: | Z000025 |
|    | Maize Porridge with sugar             | Value: | Z000046 |
|    | Maize roller meal Z                   | Value: | Z000026 |
|    | Maize samp                            | Value: | 8       |
|    | Mango fresh                           | Value: | F516111 |
|    | Manioc (cassava)                      | Value: | K410000 |
|    | Mice (mbeba)                          | Value: | 9       |
|    | Munkoyo                               | Value: | 10      |
|    | Mushrooms fresh cooked                | Value: | K700121 |
|    | Natural youghurt                      | Value: | 11      |
|  | Nshima Maize                          | Value: | Z000022 |
|  | Nshima, maize and sorghum             | Value: | Z000029 |
|  | Nshima, sorgum and millet             | Value: | Z000030 |
|  | Okra Lady fingers                     | Value: | 12      |
|  | Onion                                 | Value: | 19      |
|  | Onions fresh cooked                   | Value: | G480121 |
|  | Orange fresh                          | Value: | F603111 |
|  | Papaya fresh                          | Value: | F517111 |
|  | Peanut butter                         | Value: | 13      |
|  | Pizza                                 | Value: | _164100 |
|  | Pumpkin leaves cooked with groundnuts | Value: | Z000063 |

|  |                                            |        |         |
|--|--------------------------------------------|--------|---------|
|  | Pumpkin leaves relish without oil          | Value: | Z000006 |
|  | Rape fresh boiled                          | Value: | Z000010 |
|  | Rice parboiled cooked                      | Value: | C359022 |
|  | Salt                                       | Value: | 14      |
|  | Shake and Sip (maheu)                      | Value: | Z000040 |
|  | Sour milk                                  | Value: | 15      |
|  | Sugar T                                    | Value: | Z000012 |
|  | Sunflower oil                              | Value: | 16      |
|  | Sweet potato fresh EP                      | Value: | Z000038 |
|  | Sweet potato leaves boiled                 | Value: | Z000003 |
|  | Sweet potato leaves cooked with groundnuts | Value: | Z000052 |
|  | Tomato red fresh                           | Value: | G561111 |
|  | Tomatoes fresh cooked                      | Value: | G560121 |
|  | Water                                      | Value: | 17      |
|  | Watermelon fresh                           | Value: | F509111 |
|  | Wholemeal bread                            | Value: | B101000 |
|  | Other (please specify!)                    | Value: | 998     |

abc

\* If OTHER, please specify:

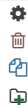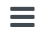

Please complete Sections: C, D and E ONLY after you have written down the all the food and drinks \${name\_infant} ate since waking up yesterday until \${name\_infant} went to sleep the next day.

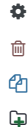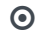

▼ \* C. How was this food item prepared?

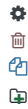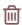

Raw / fresh

Value:

1

|  |                |        |     |
|--|----------------|--------|-----|
|  | Boiled         | Value: | 2   |
|  | Cooked         | Value: | 3   |
|  | Roasted        | Value: | 4   |
|  | Fried          | Value: | 5   |
|  | Steamed        | Value: | 6   |
|  | Baked          | Value: | 7   |
|  | Smoked         | Value: | 8   |
|  | Dried          | Value: | 9   |
|  | Processed      | Value: | 10  |
|  | Not applicable | Value: | 999 |
|  | No answer      | Value: | 997 |

1.0

\* D. Amount / quantity of food/drink consumed:

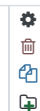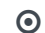

▼ \* E. Unit of measurement:

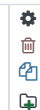

|  |                  |        |   |
|--|------------------|--------|---|
|  | g (grams)        | Value: | 1 |
|  | ml (milliliters) | Value: | 2 |

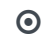

▼ \* E. Category:

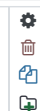

|  |                                                                                                                                                                                      |        |    |
|--|--------------------------------------------------------------------------------------------------------------------------------------------------------------------------------------|--------|----|
|  | Group 1A: Grains , roots, and tubers. i.e. maize meal porridge, maize meal and cassava porridge, sorghum and millet porridge, bread, rice, munkoyo and other foods made from grains. | Value: | 1a |
|  | Group 1B: White potatoes, sweet potatoes, white yams, cassava, chikanda and other foods made from roots.                                                                             | Value: | 1b |
|  | Food item was not mentioned in or does not fit any of the food categories above.                                                                                                     | Value: | 10 |

|                                                                                   |                                                                                                                                                                            |        |    |
|-----------------------------------------------------------------------------------|----------------------------------------------------------------------------------------------------------------------------------------------------------------------------|--------|----|
|   | Group 2: Legumes and nuts. i.e. beans, ground nuts, peas, lentils and seeds.                                                                                               | Value: | 2  |
|  | Group 3: Milk and milk products (e.g.: cheese, milk (fresh & processed), sour milk, yoghurt, etc.)                                                                         | Value: | 3a |
|  | Group 4: Flesh foods. i.e. organ meats (Liver, Kidney, Heart, Tongue) and any meat (Beef, Pork, Lamb, Goat, Chicken or Duck).                                              | Value: | 4  |
|  | Group 5: Eggs                                                                                                                                                              | Value: | 5  |
|  | Group 6A: Vitamin A rich fruit and vegetables yellow/orange colour in the inside (e.g. papaya, pumpkin, carrots, squash, or orange-fleshed sweet potatoes, guava, mangoes) | Value: | 6a |
|  | Group 6B: Vitamin A rich vegetables. i.e. dark green vegetables, bondwe, chibwabwa, kalembula, Chinese cabbage                                                             | Value: | 6b |
|  | Group 6C: other vegetables e.g. impwa, cucumber, cabbage                                                                                                                   | Value: | 6d |
|  | Group 7: Other fruit and vegetables. i.e. wild fruit (Mfungo, Mutungulu, Chisongole) or any other wild fruit or vegetables.                                                | Value: | 7  |
|  | Group 8A: Others (i.e. any oil, fats, or butter or foods made with any of these)                                                                                           | Value: | 8  |
|  | Group 8B: Others (i.e. any sugary foods (Chocolates, Sweets, Candies, Pastries, Cakes or Biscuits))                                                                        | Value: | 8b |
|  | Group 8C: Others (i.e. condiments for flavor (Chillies, Spices, Herbs, or Fish powder))                                                                                    | Value: | 8c |
|  | Group 9: Beverages (i.e. tea, coffee, etc.)                                                                                                                                | Value: | 9  |

1+1

count(\${questions\_infant})

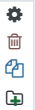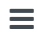

Number of food items \${name\_infant} ate yesterday: \${C3\_7}

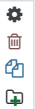

## ▼ Infant feeding

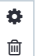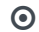

▼ \* Does \${name\_infant} eat fish?

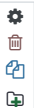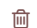

Yes

Value:

1

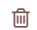

No

Value:

0

|                        |                                                                                                                                                                                                                                           |                                              |
|------------------------|-------------------------------------------------------------------------------------------------------------------------------------------------------------------------------------------------------------------------------------------|----------------------------------------------|
| 123                    | * How old was \${name_infant} when you started feeding him / her fish?                                                                                                                                                                    | <div><div></div><div></div><div></div></div> |
| <div><div></div></div> | <div>▼ * Was \${name_infant} breastfed or did \${name_infant} consume breastmilk yesterday during the day or at night?</div> <div><div><div></div>Yes</div><div>Value:1</div></div> <div><div><div></div>No</div><div>Value:0</div></div> |                                              |



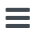

ENUMERATOR: Find out all the food and drinks (including drinking water) \${name\_child} ate since waking up yesterday until the child went to sleep the next day. This includes snacks and drinks consumed between meals. Steps: \n1. Ask \${name} about the first meal \${name\_child} had yesterday. What time was it? \n2. Ask \${name} about all the food and drinks \${name\_child} had during that meal. Write only ONE food or drink in each section A box. Click "+" on the lower right corner of section A to add a new box for each food or drink. Remember to ask about quantity of water added when cooking. 3. If there is a mixed dish, please ask \${name} for a list and quantities of ingredients. Remember to probe for added foods such as sugar in tea, oil in mixed dishes and fried food. Write each ingredient in a new section A box. Do not write down the mixed dish. ONLY write down the ingredients. \n4. After \${name} recalls all the foods and drinks \${name\_child} consumed for that meal, probe him/her to ensure that there is nothing else that he/she forgot to mention. If yes, add a new section A box and write in it. \n5. Probe \${name} until she says "nothing else" before moving to the next meal. \n6. Ask \${name} about the next meal \${name\_child} had yesterday. \n7. Repeat steps 2-6 until \${name} says that \${name\_child} went to sleep the next day. 8. Then go back and complete field C, D and E for each food item.

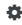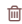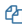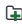

▼ Questions:

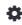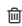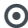

▼ \* B. What did \${name\_child} eat?

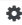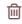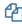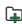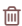

Avocado fresh

Value:

F502111



Banana Ripe

Value:

1



Beans Solwezi Z

Value:

Z000021

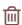

Beans. Kabulangeti Z

Value:

Z000020



Beans. Kidney.boiled without salt

Value:

Z000023



Beans. white. boiled W

Value:

Z000019



Beef fat fresh cooked

Value:

U103121



Beef medium fat fresh cooked

Value:

U102121

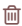

Beef stomach/tripe cooked (offals)

Value:

V551021



Biscuits

Value:

D700000



Boiled potatoes (R)

Value:

\_193301



Bondwe boiled without salt W

Value:

Z000011



Bream (fish)

Value:

Z000034



Brown bread from wheaten mixture

Value:

B251000



Busala

Value:

2



Carrot fresh

Value:

G620111



Carrot fresh cooked

Value:

G620121



cassava leaves fresh cooked with groundnuts

Value:

Z000049

|                                                                                     |                                        |        |         |
|-------------------------------------------------------------------------------------|----------------------------------------|--------|---------|
|     | caterpillars (vinkhulubala)            | Value: | 3       |
|    | Chicken                                | Value: | 21      |
|    | Chikanda                               | Value: | 4       |
|    | Chinese cabbage                        | Value: | 20      |
|    | Chinese cabbage fresh cooked           | Value: | G321121 |
|    | Chips (French-fried potatoes) (R)      | Value: | _164700 |
|    | Cola beverages (caffeinic)             | Value: | N330000 |
|    | Corn puffs                             | Value: | 22      |
|    | Cow's milk boiled                      | Value: | M110030 |
|    | Dairy Products-Tinned or Fresh milk    | Value: | 5       |
|    | Doughnuts (R)                          | Value: | _115001 |
|    | Eggs Boiled                            | Value: | Z000031 |
|    | Fish small dried with oil and tomatoes | Value: | Z000008 |
|    | Fried sausage (R)                      | Value: | _025002 |
|    | Groundnuts. Dried. raw Z               | Value: | Z000015 |
|    | Groundnuts. Powder T                   | Value: | Z000017 |
|    | Impwa                                  | Value: | 18      |
|  | Inswa                                  | Value: | 6       |
|  | Kapenta (fish)                         | Value: | Z000018 |
|  | Lumanda                                | Value: | 7       |
|  | Maize breakfast meal Z                 | Value: | Z000025 |
|  | Maize Porridge with sugar              | Value: | Z000046 |
|  | Maize roller meal Z                    | Value: | Z000026 |
|  | Maize samp                             | Value: | 8       |
|  | Mango fresh                            | Value: | F516111 |
|  | Manioc (cassava)                       | Value: | K410000 |
|  | Mice (mbeba)                           | Value: | 9       |
|  | Munkoyo                                | Value: | 10      |

|                                                                                     |                                            |        |         |
|-------------------------------------------------------------------------------------|--------------------------------------------|--------|---------|
|     | Mushrooms fresh cooked                     | Value: | K700121 |
|    | Natural yoghurt                            | Value: | 11      |
|    | Nshima Maize                               | Value: | Z000022 |
|    | Nshima, maize and sorghum                  | Value: | Z000029 |
|    | Nshima, sorgum and millet                  | Value: | Z000030 |
|    | Okra Lady fingers                          | Value: | 12      |
|    | Onion                                      | Value: | 19      |
|    | Onions fresh cooked                        | Value: | G480121 |
|    | Orange fresh                               | Value: | F603111 |
|    | Papaya fresh                               | Value: | F517111 |
|    | Peanut butter                              | Value: | 13      |
|    | Pizza                                      | Value: | _164100 |
|    | Pumpkin leaves cooked with groundnuts      | Value: | Z000063 |
|    | Pumpkin leaves relish without oil          | Value: | Z000006 |
|    | Rape fresh boiled                          | Value: | Z000010 |
|    | Rice parboiled cooked                      | Value: | C359022 |
|    | Salt                                       | Value: | 14      |
|  | Shake and Sip (maheu)                      | Value: | Z000040 |
|  | Sour milk                                  | Value: | 15      |
|  | Sugar T                                    | Value: | Z000012 |
|  | Sunflower oil                              | Value: | 16      |
|  | Sweet potato fresh EP                      | Value: | Z000038 |
|  | Sweet potato leaves boiled                 | Value: | Z000003 |
|  | Sweet potato leaves cooked with groundnuts | Value: | Z000052 |
|  | Tomato red fresh                           | Value: | G561111 |
|  | Tomatoes fresh cooked                      | Value: | G560121 |
|  | Water                                      | Value: | 17      |
|  | Watermelon fresh                           | Value: | F509111 |

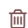

Wholemeal bread

Value:

B101000

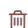

Other (please specify!)

Value:

998

abc

\* If OTHER, please specify:

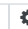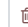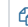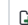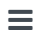

Please complete Sections: C, D and E ONLY after you have written down the all the food and drinks \${name\_child} ate since waking up yesterday until \${name\_child} went to sleep the next day.

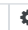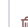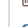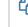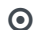

▼ \* C. How was this food item prepared?

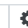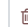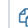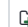

Raw / fresh

Value:

1



Boiled

Value:

2

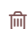

Cooked

Value:

3

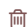

Roasted

Value:

4



Fried

Value:

5

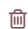

Steamed

Value:

6

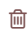

Baked

Value:

7

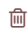

Smoked

Value:

8



Dried

Value:

9



Processed

Value:

10



Not applicable

Value:

999

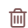

No answer

Value:

997

1.0

\* D. Amount / quantity of food/drink consumed:

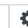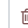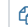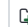

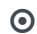

▼ \* E. Unit of measurement:

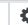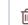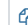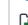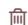

g (grams)

Value:

1



ml (milliliters)

Value:

2

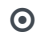

▼ \* E. Category:

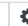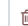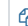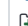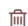

Group 1A: Grains , roots, and tubers. i.e. maize meal porridge, maize meal and cassava porridge, sorghum and millet porridge, bread, rice, munkoyo and other foods made from grains.

Value:

1a

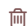

Group 1B: White potatoes, sweet potatoes, white yams, cassava, chikanda and other foods made from roots.

Value:

1b

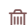

Food item was not mentioned in or does not fit any of the food categories above.

Value:

10

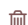

Group 2: Legumes and nuts. i.e. beans, ground nuts, peas, lentils and seeds.

Value:

2

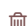

Group 3: Milk and milk products (e.g.: cheese, milk (fresh & processed), sour milk, yoghurt, etc.)

Value:

3a

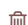

Group 4: Flesh foods. i.e. organ meats (Liver, Kidney, Heart, Tongue) and any meat (Beef, Pork, Lamb, Goat, Chicken or Duck).

Value:

4



Group 5: Eggs

Value:

5

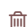

Group 6A: Vitamin A rich fruit and vegetables yellow/orange colour in the inside (e.g. papaya, pumpkin, carrots, squash, or orange-fleshed sweet potatoes, guava, mangoes)

Value:

6a



Group 6B: Vitamin A rich vegetables. i.e. dark green vegetables, bondwe, chibwabwa, kalembula, Chinese cabbage

Value:

6b



Group 6C: other vegetables e.g. impwa, cucumber, cabbage

Value:

6d



Group 7: Other fruit and vegetables. i.e. wild fruit (Mfungo, Mutungulu, Chisongole) or any other wild fruit or vegetables.

Value:

7



Group 8A: Others (i.e. any oil, fats, or butter or foods made with any of these)

Value:

8



Group 8B: Others (i.e. any sugary foods (Chocolates, Sweets, Candies, Pastries, Cakes or Biscuits))

Value:

8b

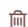

Group 8C: Others (i.e. condiments for flavor (Chillies, Spices, Herbs, or Fish powder))

Value:

8c



Group 9: Beverages (i.e. tea, coffee, etc.)

Value:

9

1+1

count(\${questions\_child})

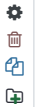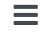

Number of food items \${name\_child} ate yesterday: \${C4\_7}

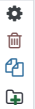

## ▼ 24 Hour Recall (male hh member)

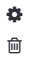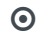

▼ \* A. Is there any male household member older than 15 years of age?

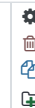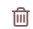

Yes

Value:

1

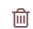

No

Value:

0

## ▼ If yes, identify ONE representative male household member from the household and administer the the following questions directly to him!

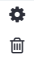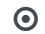

▼ \* What is your relationship to the child for whom the recall was done before?

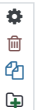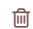

Bother

Value:

1

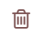

Father

Value:

2



Uncle

Value:

3



Grandpa

Value:

4



Friend of the family

Value:

5

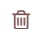

Other (please specify!)

Value:

998

abc

\* If OTHER, please specify:

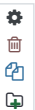

123

\* Age in years:

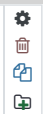

abc

\* What is your name?

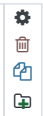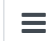

Beginning The 24 Hour Recall:

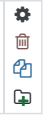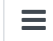

ENUMERATOR: Find out all the food and drinks (including drinking water) \${name\_malehh} member ate since waking up yesterday until he went to sleep the next day. This includes snacks and drinks consumed between meals. Steps: \n1. Ask \${name\_malehh} about the first meal he had yesterday. \n2. Ask \${name\_malehh} about all the food and drinks he had during that meal. Write only ONE food or drink in each section A box. Click "+" on the lower right corner of section A to add a new box for each food or drink. Remember to ask about quantity of water added when cooking. 3. If there is a mixed dish, please ask \${name\_malehh} for a list and quantities of ingredients. Remember to probe for added foods such as sugar in tea, oil in mixed dishes and fried food. Write each ingredient in a new section A box. Do not write down the mixed dish. ONLY write down the ingredients. \n4. After \${name\_malehh} recalls all the foods and drinks he had consumed for that meal, probe him/her to ensure that there is nothing else that he forgot to mention. If yes, add a new section A box and write in it. \n5. Probe \${name\_malehh} until he says "nothing else" before moving to the next meal. \n6. Ask \${name\_malehh} about the next meal he had yesterday. \n7. Repeat steps 2-6 until \${name\_malehh} says that he went to sleep the next day. 8. Then go back and complete field C, D and E for each food item.

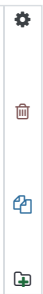

▼ Questions:

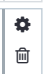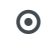

▼ \* B. What did \${name} eat?

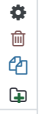

|  |                                    |        |         |
|--|------------------------------------|--------|---------|
|  | Avocado fresh                      | Value: | F502111 |
|  | Banana Ripe                        | Value: | 1       |
|  | Beans Solwezi Z                    | Value: | Z000021 |
|  | Beans. Kabulangeti Z               | Value: | Z000020 |
|  | Beans. Kidney.boiled without salt  | Value: | Z000023 |
|  | Beans. white. boiled W             | Value: | Z000019 |
|  | Beef fat fresh cooked              | Value: | U103121 |
|  | Beef medium fat fresh cooked       | Value: | U102121 |
|  | Beef stomach/tripe cooked (offals) | Value: | V551021 |
|  | Biscuits                           | Value: | D700000 |
|  | Boiled potatoes (R)                | Value: | _193301 |

|                                                                                     |                                             |        |         |
|-------------------------------------------------------------------------------------|---------------------------------------------|--------|---------|
|     | Bondwe boiled without salt W                | Value: | Z000011 |
|    | Bream (fish)                                | Value: | Z000034 |
|    | Brown bread from wheaten mixture            | Value: | B251000 |
|    | Busala                                      | Value: | 2       |
|    | Carrot fresh                                | Value: | G620111 |
|    | Carrot fresh cooked                         | Value: | G620121 |
|    | cassava leaves fresh cooked with groundnuts | Value: | Z000049 |
|    | caterpillars (vinkhulubala)                 | Value: | 3       |
|    | Chicken                                     | Value: | 21      |
|    | Chikanda                                    | Value: | 4       |
|    | Chinese cabbage                             | Value: | 20      |
|    | Chinese cabbage fresh cooked                | Value: | G321121 |
|    | Chips (French-fried potatoes) (R)           | Value: | _164700 |
|    | Cola beverages (caffeinic)                  | Value: | N330000 |
|    | Corn puffs                                  | Value: | 22      |
|    | Cow's milk boiled                           | Value: | M110030 |
|    | Dairy Products-Tinned or Fresh milk         | Value: | 5       |
|  | Doughnuts (R)                               | Value: | _115001 |
|  | Eggs Boiled                                 | Value: | Z000031 |
|  | Fish small dried with oil and tomatoes      | Value: | Z000008 |
|  | Fried sausage (R)                           | Value: | _025002 |
|  | Groundnuts. Dried. raw Z                    | Value: | Z000015 |
|  | Groundnuts. Powder T                        | Value: | Z000017 |
|  | Impwa                                       | Value: | 18      |
|  | Inswa                                       | Value: | 6       |
|  | Kapenta (fish)                              | Value: | Z000018 |
|  | Lumanda                                     | Value: | 7       |
|  | Maize breakfast meal Z                      | Value: | Z000025 |



|                                                                                     |                                       |        |         |
|-------------------------------------------------------------------------------------|---------------------------------------|--------|---------|
|     | Maize Porridge with sugar             | Value: | Z000046 |
|    | Maize roller meal Z                   | Value: | Z000026 |
|    | Maize samp                            | Value: | 8       |
|    | Mango fresh                           | Value: | F516111 |
|    | Manioc (cassava)                      | Value: | K410000 |
|    | Mice (mbeba)                          | Value: | 9       |
|    | Munkoyo                               | Value: | 10      |
|    | Mushrooms fresh cooked                | Value: | K700121 |
|    | Natural youghurt                      | Value: | 11      |
|    | Nshima Maize                          | Value: | Z000022 |
|    | Nshima, maize and sorghum             | Value: | Z000029 |
|    | Nshima, sorgum and millet             | Value: | Z000030 |
|    | Okra Lady fingers                     | Value: | 12      |
|    | Onion                                 | Value: | 19      |
|    | Onions fresh cooked                   | Value: | G480121 |
|    | Orange fresh                          | Value: | F603111 |
|    | Papaya fresh                          | Value: | F517111 |
|  | Peanut butter                         | Value: | 13      |
|  | Pizza                                 | Value: | _164100 |
|  | Pumpkin leaves cooked with groundnuts | Value: | Z000063 |
|  | Pumpkin leaves relish without oil     | Value: | Z000006 |
|  | Rape fresh boiled                     | Value: | Z000010 |
|  | Rice parboiled cooked                 | Value: | C359022 |
|  | Salt                                  | Value: | 14      |
|  | Shake and Sip (maheu)                 | Value: | Z000040 |
|  | Sour milk                             | Value: | 15      |
|  | Sugar T                               | Value: | Z000012 |
|  | Sunflower oil                         | Value: | 16      |

|  |                                            |        |         |
|--|--------------------------------------------|--------|---------|
|  | Sweet potato fresh EP                      | Value: | Z000038 |
|  | Sweet potato leaves boiled                 | Value: | Z000003 |
|  | Sweet potato leaves cooked with groundnuts | Value: | Z000052 |
|  | Tomato red fresh                           | Value: | G561111 |
|  | Tomatoes fresh cooked                      | Value: | G560121 |
|  | Water                                      | Value: | 17      |
|  | Watermelon fresh                           | Value: | F509111 |
|  | Wholemeal bread                            | Value: | B101000 |
|  | Other (please specify!)                    | Value: | 998     |

abc

\* If OTHER, please specify:

☰

Please complete Sections: C, D and E ONLY after you have written down the all the food and drinks \$(name) ate since waking up yesterday until \$(name) went to sleep the next day.

⦿

▼ \* C. How was this food item prepared?

|  |             |        |    |
|--|-------------|--------|----|
|  | Raw / fresh | Value: | 1  |
|  | Boiled      | Value: | 2  |
|  | Cooked      | Value: | 3  |
|  | Roasted     | Value: | 4  |
|  | Fried       | Value: | 5  |
|  | Steamed     | Value: | 6  |
|  | Baked       | Value: | 7  |
|  | Smoked      | Value: | 8  |
|  | Dried       | Value: | 9  |
|  | Processed   | Value: | 10 |

|                                                                                   |                |        |     |
|-----------------------------------------------------------------------------------|----------------|--------|-----|
|   | Not applicable | Value: | 999 |
|  | No answer      | Value: | 997 |

1.0 \* D. Amount / quantity of food/drink consumed:

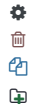

 \* E. Unit of measurement:

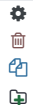

|                                                                                   |                  |        |   |
|-----------------------------------------------------------------------------------|------------------|--------|---|
|  | g (grams)        | Value: | 1 |
|  | ml (milliliters) | Value: | 2 |

 \* E. Category:

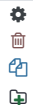

|                                                                                     |                                                                                                                                                                                      |        |    |
|-------------------------------------------------------------------------------------|--------------------------------------------------------------------------------------------------------------------------------------------------------------------------------------|--------|----|
|    | Group 1A: Grains , roots, and tubers. i.e. maize meal porridge, maize meal and cassava porridge, sorghum and millet porridge, bread, rice, munkoyo and other foods made from grains. | Value: | 1a |
|    | Group 1B: White potatoes, sweet potatoes, white yams, cassava, chikanda and other foods made from roots.                                                                             | Value: | 1b |
|  | Food item was not mentioned in or does not fit any of the food categories above.                                                                                                     | Value: | 10 |
|  | Group 2: Legumes and nuts. i.e. beans, ground nuts, peas, lentils and seeds.                                                                                                         | Value: | 2  |
|  | Group 3: Milk and milk products (e.g.: cheese, milk (fresh & processed), sour milk, yoghurt, etc.)                                                                                   | Value: | 3a |
|  | Group 4: Flesh foods. i.e. organ meats (Liver, Kidney, Heart, Tongue) and any meat (Beef, Pork, Lamb, Goat, Chicken or Duck).                                                        | Value: | 4  |
|  | Group 5: Eggs                                                                                                                                                                        | Value: | 5  |
|  | Group 6A: Vitamin A rich fruit and vegetables yellow/orange colour in the inside (e.g. papaya, pumpkin, carrots, squash, or orange-fleshed sweet potatoes, guava, mangoes)           | Value: | 6a |
|  | Group 6B: Vitamin A rich vegetables. i.e. dark green vegetables, bondwe, chibwabwa, kalembula, Chinese cabbage                                                                       | Value: | 6b |
|  | Group 6C: other vegetables e.g. impwa, cucumber, cabbage                                                                                                                             | Value: | 6d |
|  | Group 7: Other fruit and vegetables. i.e. wild fruit (Mfungo, Mutungulu, Chisongole) or any other wild fruit or vegetables.                                                          | Value: | 7  |
|  | Group 8A: Others (i.e. any oil, fats, or butter or foods made with any of these)                                                                                                     | Value: | 8  |

|                                                                                   |                                                                                                     |        |    |
|-----------------------------------------------------------------------------------|-----------------------------------------------------------------------------------------------------|--------|----|
|   | Group 8B: Others (i.e. any sugary foods (Chocolates, Sweets, Candies, Pastries, Cakes or Biscuits)) | Value: | 8b |
|  | Group 8C: Others (i.e. condiments for flavor (Chillies, Spices, Herbs, or Fish powder))             | Value: | 8c |
|  | Group 9: Beverages (i.e. tea, coffee, etc.)                                                         | Value: | 9  |

|                                                                                   |                                                                        |                                                                                                                                                                                                                                                                                                                                                 |
|-----------------------------------------------------------------------------------|------------------------------------------------------------------------|-------------------------------------------------------------------------------------------------------------------------------------------------------------------------------------------------------------------------------------------------------------------------------------------------------------------------------------------------|
| 1+1                                                                               | count(\${questions_male})                                              |     |
|  | Number of food items the male household member ate yesterday: \${C5_8} |     |

|                                                                                   |                                                                                                                                           |                                                                                                                                                                                                                                                                                                                                                 |
|-----------------------------------------------------------------------------------|-------------------------------------------------------------------------------------------------------------------------------------------|-------------------------------------------------------------------------------------------------------------------------------------------------------------------------------------------------------------------------------------------------------------------------------------------------------------------------------------------------|
| ▼ Household Dietary Diversity                                                     |                                                                                                                                           |                                                                                                                                                                           |
|  | In the past one week, how many times were the following food types eaten by members of your household, either as part of meals or snacks? |     |

|                                                                                     |                               |                                                                                                                                                                                                                                                                                                                                                         |
|-------------------------------------------------------------------------------------|-------------------------------|---------------------------------------------------------------------------------------------------------------------------------------------------------------------------------------------------------------------------------------------------------------------------------------------------------------------------------------------------------|
| ▼                                                                                   |                               |                                                                                                                                                                                   |
|   | ▼ * Fresh Fish (small)        |         |
|  | Yes                           | Value: 1                                                                                                                                                                                                                                                                                                                                                |
|  | No                            | Value: 0                                                                                                                                                                                                                                                                                                                                                |
|  | ▼ * Frequency of consumption: |     |
|  | Everday, more than once a day | Value: 1                                                                                                                                                                                                                                                                                                                                                |
|  | Everyday, once a day          | Value: 2                                                                                                                                                                                                                                                                                                                                                |

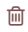

Three to four days

Value:

3

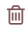

One or two days only

Value:

4

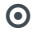

▼ \* Fresh Fish (large)

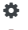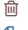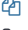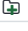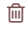

Yes

Value:

1

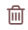

No

Value:

0

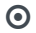

▼ \* Frequency of consumption:

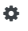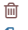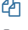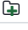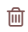

Everday, more than once a day

Value:

1

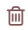

Everyday, once a day

Value:

2



Three to four days

Value:

3

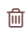

One or two days only

Value:

4

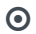

▼ \* Dried Fish (small)

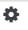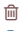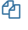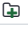

Yes

Value:

1

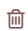

No

Value:

0

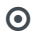

▼ \* Frequency of consumption:

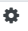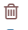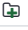

|                                                                                   |                               |        |   |
|-----------------------------------------------------------------------------------|-------------------------------|--------|---|
|  | Everday, more than once a day | Value: | 1 |
|  | Everyday, once a day          | Value: | 2 |
|  | Three to four days            | Value: | 3 |
|  | One or two days only          | Value: | 4 |

▼ \* Dried Fish (medium)






|                                                                                   |     |        |   |
|-----------------------------------------------------------------------------------|-----|--------|---|
|  | Yes | Value: | 1 |
|  | No  | Value: | 0 |

▼ \* Frequency of consumption:






|                                                                                     |                               |        |   |
|-------------------------------------------------------------------------------------|-------------------------------|--------|---|
|    | Everday, more than once a day | Value: | 1 |
|    | Everyday, once a day          | Value: | 2 |
|  | Three to four days            | Value: | 3 |
|  | One or two days only          | Value: | 4 |

▼ \* Dried Fish (large)






|                                                                                     |     |        |   |
|-------------------------------------------------------------------------------------|-----|--------|---|
|  | Yes | Value: | 1 |
|  | No  | Value: | 0 |

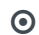

▼ \* Frequency of consumption:

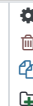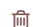

Everday, more than once a day

Value:

1

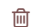

Everyday, once a day

Value:

2



Three to four days

Value:

3

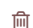

One or two days only

Value:

4

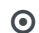

▼ \* Smoked fish (small)

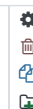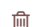

Yes

Value:

1



No

Value:

0



▼ \* Frequency of consumption:

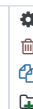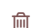

Everday, more than once a day

Value:

1

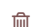

Everyday, once a day

Value:

2



Three to four days

Value:

3



One or two days only

Value:

4



▼ \* Smoked fish (medium/large)

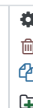

Yes

Value:

1



No

Value:

0

▼ \* Frequency of consumption:

⚙️

🗑️

📄

📌

|                                             |        |   |
|---------------------------------------------|--------|---|
| <div>🗑️</div> Everday, more than once a day | Value: | 1 |
| <div>🗑️</div> Everyday, once a day          | Value: | 2 |
| <div>🗑️</div> Three to four days            | Value: | 3 |
| <div>🗑️</div> One or two days only          | Value: | 4 |

▼ \* Salted Fish

⚙️

🗑️

📄

📌

|                   |        |   |
|-------------------|--------|---|
| <div>🗑️</div> Yes | Value: | 1 |
| <div>🗑️</div> No  | Value: | 0 |

▼ \* Frequency of consumption:

⚙️

🗑️

📄

📌

|                                             |        |   |
|---------------------------------------------|--------|---|
| <div>🗑️</div> Everday, more than once a day | Value: | 1 |
| <div>🗑️</div> Everyday, once a day          | Value: | 2 |
| <div>🗑️</div> Three to four days            | Value: | 3 |
| <div>🗑️</div> One or two days only          | Value: | 4 |

⚙️

🗑️



▼ \* Beef - steak meat, mixed cut

Yes

Value: 1

No

Value: 0

▼ \* Frequency of consumption:

Everday, more than once a day

Value: 1

Everyday, once a day

Value: 2

Three to four days

Value: 3

One or two days only

Value: 4

▼ \* Beef- organ meat, offals (Ichifu)

Yes

Value: 1

No

Value: 0

▼ \* Frequency of consumption:

Everday, more than once a day

Value: 1

Everyday, once a day

Value: 2

Three to four days

Value: 3

One or two days only

Value: 4

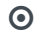

▼ \* Beef- other parts, e.g. head, hoof, etc.

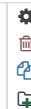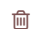

Yes

Value:

1



No

Value:

0

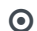

▼ \* Frequency of consumption:

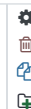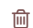

Everday, more than once a day

Value:

1

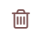

Everyday, once a day

Value:

2

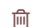

Three to four days

Value:

3



One or two days only

Value:

4

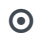

▼ \* Insects (caterpillar, ants, inswa, Nshonkonono)

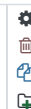

Yes

Value:

1

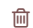

No

Value:

0

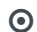

▼ \* Frequency of consumption:

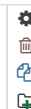

Everday, more than once a day

Value:

1



Everyday, once a day

Value:

2



Three to four days

Value:

3

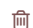

One or two days only

Value:

4

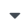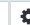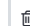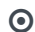

▼ \* Poultry

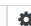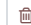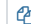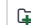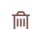

Yes

Value:

1



No

Value:

0



▼ \* Frequency of consumption:

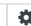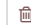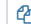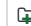

Everday, more than once a day

Value:

1



Everyday, once a day

Value:

2



Three to four days

Value:

3



One or two days only

Value:

4

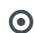

▼ \* Eggs

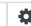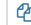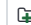

Yes

Value:

1



No

Value:

0

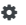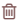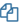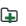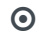

▼ \* Frequency of consumption:

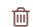

Everday, more than once a day

Value:

1

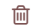

Everyday, once a day

Value:

2



Three to four days

Value:

3

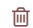

One or two days only

Value:

4

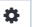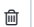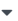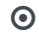

▼ \* Pulses and nuts (beans, cowpeas, groundnuts, pigeon peas)

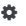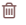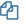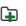

Yes

Value:

1



No

Value:

0

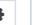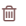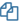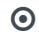

▼ \* Frequency of consumption:



Everday, more than once a day

Value:

1



Everyday, once a day

Value:

2



Three to four days

Value:

3



One or two days only

Value:

4

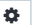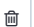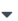

▼ \* Fresh milk and other milk products. For example: Sour milk (mabisi atemile), Longlife milk (mabisi asikuwa, amwa mapepa amu zilili), Powdered milk (mabisi abupi), Yoghurt.

Yes

Value:

1

No

Value:

0

▼ \* Frequency of consumption:

Everday, more than once a day

Value:

1

Everyday, once a day

Value:

2

Three to four days

Value:

3

One or two days only

Value:

4

▼ \* Infant Formula (nan, etc.)

Yes

Value:

1

No

Value:

0

▼ \* Frequency of consumption:

Everday, more than once a day

Value:

1

Everyday, once a day

Value:

2

Three to four days

Value:

3

One or two days only

Value:

4

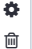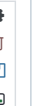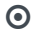

▼ \* Cereal (nshima, rice, green maize)

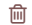

Yes

Value:

1

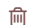

No

Value:

0

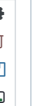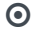

▼ \* Frequency of consumption:

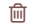

Everday, more than once a day

Value:

1

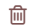

Everyday, once a day

Value:

2

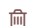

Three to four days

Value:

3

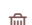

One or two days only

Value:

4

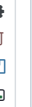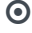

▼ \* Roots and Tubers. (cassava, sweet potatoes, Irish potatoes)

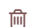

Yes

Value:

1

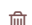

No

Value:

0

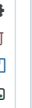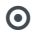

▼ \* Frequency of consumption:

|                                                                                   |                               |        |   |
|-----------------------------------------------------------------------------------|-------------------------------|--------|---|
|  | Everday, more than once a day | Value: | 1 |
|  | Everyday, once a day          | Value: | 2 |
|  | Three to four days            | Value: | 3 |
|  | One or two days only          | Value: | 4 |

▼ \* Wheat products (bread, fritters, doughnuts, cakes)






|                                                                                   |     |        |   |
|-----------------------------------------------------------------------------------|-----|--------|---|
|  | Yes | Value: | 1 |
|  | No  | Value: | 0 |

▼ \* Frequency of consumption:






|                                                                                     |                               |        |   |
|-------------------------------------------------------------------------------------|-------------------------------|--------|---|
|    | Everday, more than once a day | Value: | 1 |
|    | Everyday, once a day          | Value: | 2 |
|  | Three to four days            | Value: | 3 |
|  | One or two days only          | Value: | 4 |

▼




▼ \* Vegetables (rape, chiwawa, kalembula, spinach)






|                                                                                     |     |        |   |
|-------------------------------------------------------------------------------------|-----|--------|---|
|  | Yes | Value: | 1 |
|  | No  | Value: | 0 |



▼ \* Frequency of consumption:

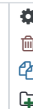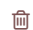

Everday, more than once a day

Value:

1



Everyday, once a day

Value:

2



Three to four days

Value:

3



One or two days only

Value:

4



▼ \* Vegetables (fisashi, impwa)

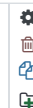

Yes

Value:

1



No

Value:

0



▼ \* Frequency of consumption:

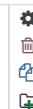

Everday, more than once a day

Value:

1



Everyday, once a day

Value:

2



Three to four days

Value:

3

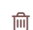

One or two days only

Value:

4

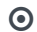

▼ \* Vegetables (cabbage)

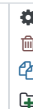





Yes

Value:

1



No

Value:

0

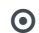

▼ \* Frequency of consumption:

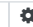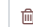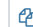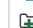

Everday, more than once a day

Value:

1



Everyday, once a day

Value:

2



Three to four days

Value:

3



One or two days only

Value:

4



▼ \* Vegetables (carrots, butternut, pumpkin, beetroot)

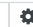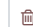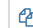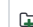

Yes

Value:

1



No

Value:

0



▼ \* Frequency of consumption:

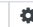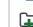

Everday, more than once a day

Value:

1



Everyday, once a day

Value:

2



Three to four days

Value:

3



One or two days only

Value:

4



|                                                                                   |                               |        |   |
|-----------------------------------------------------------------------------------|-------------------------------|--------|---|
|  | Everday, more than once a day | Value: | 1 |
|  | Everyday, once a day          | Value: | 2 |
|  | Three to four days            | Value: | 3 |
|  | One or two days only          | Value: | 4 |

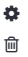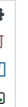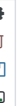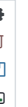

▼ \* Frequency of consumption:

Everyday, more than once a day

Value:

1

Everyday, once a day

Value:

2

Three to four days

Value:

3

One or two days only

Value:

4

▼ \* What is the main source of food consumed in this household?

Food acquired from purchases

Value:

1

Food caught / produced by the household

Value:

2

Gifts

Value:

3

Food assistance

Value:

4

Exchanged for other item (barter)(please specify)

Value:

5

Other (please specify!)

Value:

998

abc

\* If Other, please specify:

|                                                       |                                                                                                                                                                                |
|-------------------------------------------------------|--------------------------------------------------------------------------------------------------------------------------------------------------------------------------------|
| <p><b>▼ Section D: Household Fish consumption</b></p> | <br> |
|-------------------------------------------------------|--------------------------------------------------------------------------------------------------------------------------------------------------------------------------------|



▼ \* Has the household eaten fish during the last 24 hours?

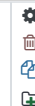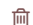

Yes

Value:

1



No

Value:

0

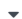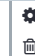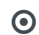

▼ \* Tick the fish species that was consumed by any member of the household yesterday. If more, please tick the + button and repeat!

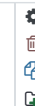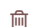

Nchenga

Value:

1



Mintesa / Nyanse

Value:

2

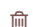

Milamba / Milonge (Bubble Fish)

Value:

3

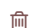

Buka Buka Fish

Value:

4



Kapenta

Value:

5



Chisense

Value:

6



Mpulungu Chisense

Value:

7

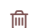

Siavonga Chisense

Value:

8



Kababa (small fish)

Value:

9



Nkolonkolo

Value:

10



Dagga

Value:

11



Bream

Value:

12

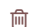

Other (please specify!)

Value:

998

abc

\* Please specify!

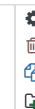

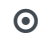

▼ \* Do you know which bream species?

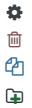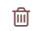

Yes

Value:

1



No

Value:

0

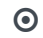

▼ \* Select species:

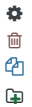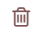

Three-spotted Bream

Value:

1

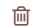

Nile Bream

Value:

2

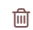

Green-headed Bream

Value:

3



Redbreast Bream

Value:

4

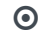

▼ \* How did you acquire the fish?

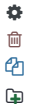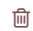

Fish acquired from purchases

Value:

1



Fish caught or produced by a household member

Value:

2



Gift

Value:

3

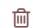

Food assistance

Value:

4

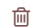

Exchanged for other item (barter)(please specify)

Value:

5

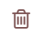

Other (please specify!)

Value:

998

abc

\* Please specify the item of barter

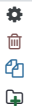

abc

\* Please specify

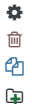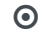

▼ \* In what form was it acquired?

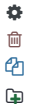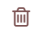

Fresh

Value:

1

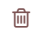

Dried

Value:

2



Fried

Value:

3



Salted and dried

Value:

4



Smoked

Value:

5

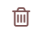

Roasted

Value:

6

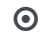

▼ \* Wich portion was acquired?

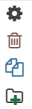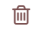

Whole fish

Value:

1

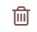

Chunk of fish

Value:

2

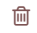

Small fish (whole)

Value:

3

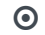

▼ \* Which way of preparation?

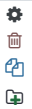

Raw

Value:

1



Fried

Value:

2



Boiled / cooked

Value:

3

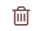

Steamed

Value:

4



Dried

Value:

5

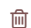

Roasted

Value:

6

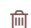

Fish was pre-prepared

Value:

7

▼ Fish consumption patterns (1)

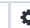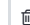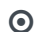

▼ \* Do all household members consume all types of fish species?

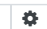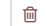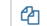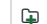

Yes

Value:

1

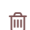

No

Value:

0

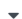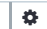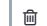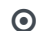

▼ \* Tick the household member / group who does / do not consume fish. If more groups, please tick the + button and repeat for every single group!

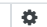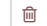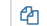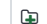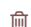

Children

Value:

1

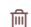

Pregnant women

Value:

2



Elderly women

Value:

3



Lactating mothers

Value:

4



Other (please specify!)

Value:

998

abc

\* If other, please specify!

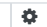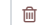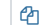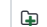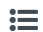

▼ \* Which fish species do they not consume?

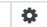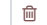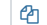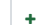



|                                                                                   |                                 |        |     |
|-----------------------------------------------------------------------------------|---------------------------------|--------|-----|
|  | Nchenga                         | Value: | 1   |
|  | Mintesa / Nyanse                | Value: | 2   |
|  | Milamba / Milonge (Bubble Fish) | Value: | 3   |
|  | Buka Buka Fish                  | Value: | 4   |
|  | Kapenta                         | Value: | 5   |
|  | Chisense                        | Value: | 6   |
|  | Mpulungu Chisense               | Value: | 7   |
|  | Siavonga Chisense               | Value: | 8   |
|  | Kababa (small fish)             | Value: | 9   |
|  | Nkolonkolo                      | Value: | 10  |
|  | Dagga                           | Value: | 11  |
|  | Bream                           | Value: | 12  |
|  | Other (please specify!)         | Value: | 998 |

abc

\* If other, please specify!

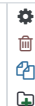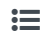

▼ \* Which part of the fish do they not consume?

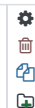

|                                                                                     |                |        |     |
|-------------------------------------------------------------------------------------|----------------|--------|-----|
|  | Head           | Value: | 1   |
|  | Tail           | Value: | 2   |
|  | Filet          | Value: | 3   |
|  | Edible offals  | Value: | 4   |
|  | Not applicable | Value: | 999 |
|  | No answer      | Value: | 997 |

▼ Fish consumption patterns (2)

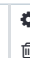

▼ \* In your community, are pregnant and lactating women allowed to consume all types of fish species?

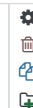

Yes

Value:

1



No

Value:

0

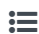

▼ \* If no, what are the reasons that hinder the consumption of fish by these groups of women?

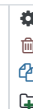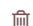

Gives rashes

Value:

1



Connected to evil spirits

Value:

2



Use of unhealthy preservatives by traders

Value:

3



Fish has unpleasant smell

Value:

4



Children can get injured by the bones

Value:

5



Considered as food for low class people

Value:

6



Other (please specify!)

Value:

998

abc

\* If other, please specify!

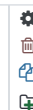

▼ Preferred fish

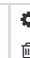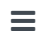

What are the top 3 mostly consumed fish species?

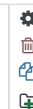



▼ \* Select rank 1:



|  |                                 |        |     |
|--|---------------------------------|--------|-----|
|  | Nchenga                         | Value: | 1   |
|  | Mintesa / Nyanse                | Value: | 2   |
|  | Milamba / Milonge (Bubble Fish) | Value: | 3   |
|  | Buka Buka Fish                  | Value: | 4   |
|  | Kapenta                         | Value: | 5   |
|  | Chisense                        | Value: | 6   |
|  | Mpulungu Chisense               | Value: | 7   |
|  | Siavonga Chisense               | Value: | 8   |
|  | Kababa (small fish)             | Value: | 9   |
|  | Nkolonkolo                      | Value: | 10  |
|  | Dagga                           | Value: | 11  |
|  | Bream                           | Value: | 12  |
|  | Other (please specify!)         | Value: | 998 |

abc

\* If other, please specify!

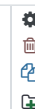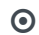

▼ \* Why do you consume / prefer this fish?

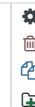

|  |                                       |        |     |
|--|---------------------------------------|--------|-----|
|  | Price (cheaper than other fish)       | Value: | 1   |
|  | Taste (tastes better than other fish) | Value: | 2   |
|  | Availability (easily available)       | Value: | 3   |
|  | Comfort (easy to prepare and cook)    | Value: | 4   |
|  | Other (please specify!)               | Value: | 998 |

abc

\* If other, please specify!





▼ \* Select rank 2:



|                                                                                     |                                 |        |     |
|-------------------------------------------------------------------------------------|---------------------------------|--------|-----|
|    | Nchenga                         | Value: | 1   |
|    | Mintesa / Nyanse                | Value: | 2   |
|    | Milamba / Milonge (Bubble Fish) | Value: | 3   |
|    | Buka Buka Fish                  | Value: | 4   |
|    | Kapenta                         | Value: | 5   |
|    | Chisense                        | Value: | 6   |
|    | Mpulungu Chisense               | Value: | 7   |
|    | Siavonga Chisense               | Value: | 8   |
|    | Kababa (small fish)             | Value: | 9   |
|    | Nkolonkolo                      | Value: | 10  |
|    | Dagga                           | Value: | 11  |
|  | Bream                           | Value: | 12  |
|  | Other (please specify!)         | Value: | 998 |

abc

\* If other, please specify!





▼ \* Why do you consume / prefer this fish?



|                                                                                     |                                 |        |   |
|-------------------------------------------------------------------------------------|---------------------------------|--------|---|
|  | Price (cheaper than other fish) | Value: | 1 |
|-------------------------------------------------------------------------------------|---------------------------------|--------|---|



Taste (tastes better than other fish)

Value:

2



Availability (easily available)

Value:

3



Comfort (easy to prepare and cook)

Value:

4

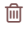

Other (please specify!)

Value:

998

abc

\* If other, please specify!

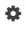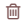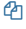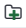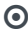

▼ \* Select rank 3:

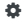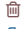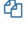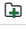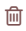

Nchenga

Value:

1



Mintesa / Nyanse

Value:

2



Milamba / Milonge (Bubble Fish)

Value:

3



Buka Buka Fish

Value:

4



Kapenta

Value:

5



Chisense

Value:

6



Mpulungu Chisense

Value:

7



Siavonga Chisense

Value:

8



Kababa (small fish)

Value:

9



Nkolonkolo

Value:

10



Dagga

Value:

11



Bream

Value:

12



Other (please specify!)

Value:

998

abc

\* If other, please specify!

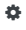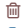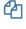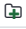



Yes

Value:1

No

Value:0

1.0

\* Weight in kg:

1.0

\* Height in cm:

▼ \* How was this child's height measured?

Lying down

Value:1

Standing up

Value:2

No measurement was taken

Value:3

abc

\* Reason for not being measured?

▼ \* Is this child still breast fed?

Yes

Value:1

No

Value:0

▼ Anthropometrics of the mother or the permant care taker of the child





1+1       $\$E14 \div ((\$E12 \div 100) * (\$E12 \div 100))$

≡      BMI of  $\$E\_name\_women$ :  $\$E15$

▼ Section F: Health

≡      Please fill the following forms for the child and / or the infant. Make sure that information is collected of those children that the recall was done for earlier on.

▼ Health of the Child (2-5 years of age)

⦿      ▼ \* Has  $\$name\_child$  suffered from any illnesses in the last two weeks?

|                                                                                       |        |   |
|---------------------------------------------------------------------------------------|--------|---|
|  Yes | Value: | 1 |
|  No  | Value: | 0 |

≡      ▼ \* From which illness has  $\$name\_child$  suffered from in the last two weeks?

|                                                                                                             |        |     |
|-------------------------------------------------------------------------------------------------------------|--------|-----|
|  Diarrhea                | Value: | 1   |
|  Fever                   | Value: | 2   |
|  Malaria                 | Value: | 3   |
|  Cough and flu           | Value: | 4   |
|  Other (please specify!) | Value: | 998 |

abc

\* If other, please specify!



▼ Health of the Infant ( < 23 months of age)

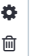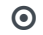

▼ \* Has \${name\_infant} suffered from any illnesses in the last two weeks?

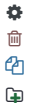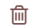

Yes

Value:

1



No

Value:

0

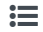

▼ \* From which illness has \${name\_infant} suffered from in the last two weeks?

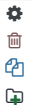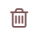

Diarrhea

Value:

1

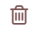

Fever

Value:

2



Malaria

Value:

3

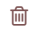

Cough and flu

Value:

4



Other (please specify!)

Value:

998

abc

\* If other, please specify!

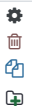

▼ Section G: Final remarks

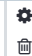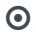

▼ \* Any comments or special remarks to be added?

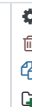



Yes

Value:

1



No

Value:

0

abc

\* Please, list them here:

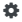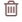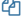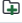

Supplement: S1 (10.1371/journal.pone.0204009.s001) [file journal.pone.0204009.s001]
